# Supplementary material for: A circular RNA generated from an intron of the insulin gene controls insulin secretion
Source: PubMed Central journal article supplement (PMC7644714; doi:10.1038/s41467-020-19381-w), 2020-11-05
Supplement: 41467_2020_19381_MOESM1_ESM.pdf [file 41467_2020_19381_MOESM1_ESM.pdf]

**Supplementary figures and tables of the manuscript “A circular RNA generated from an intron of the insulin gene controls insulin secretion”**

Supplementary figures for:

A circular RNA generated from an intron of the insulin gene controls insulin secretion

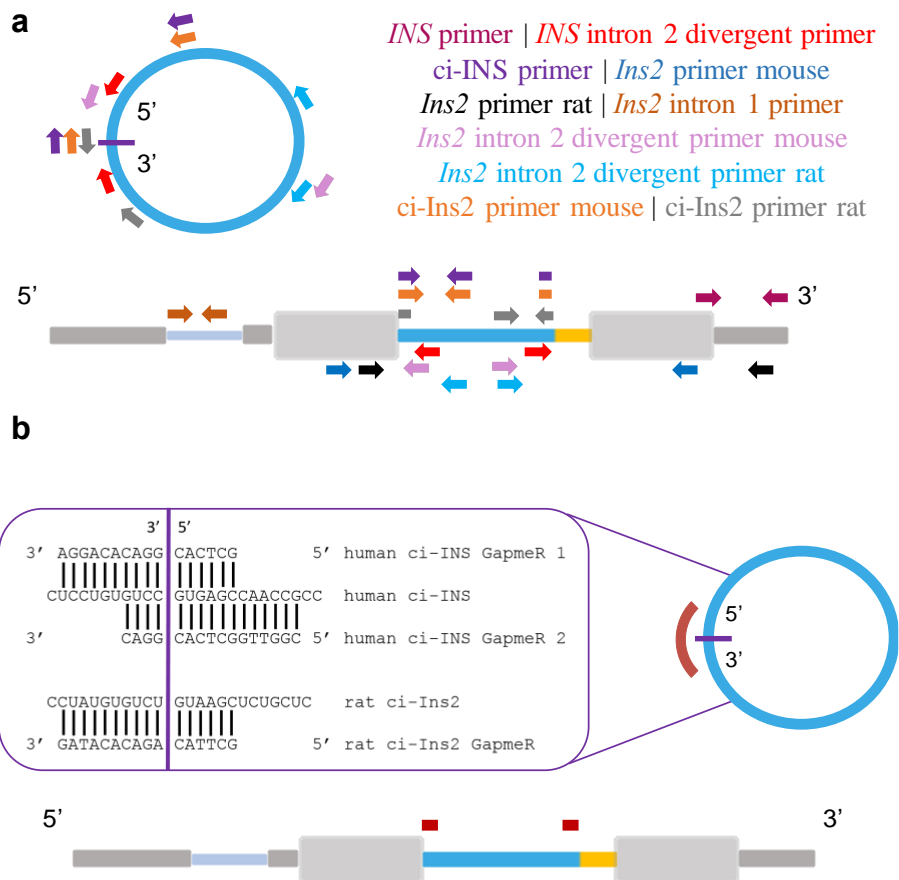

**Supplementary Fig. 1 | ci-*Ins2/Ins2* and ci-*INS/INS* primer and GapmeR binding sites.** Schematic representation of the binding sites of the corresponding (a) primers and (b) GapmeRs on the *Ins2/INS* and ci-*Ins2/ci-INS* sequences. The following color code has been used for the represented sequences: UTR Exons, CDS Exons, Intron 1, ci-*Ins2/ci-INS* sequence, Intron 2 lariat tail, GapmeR.

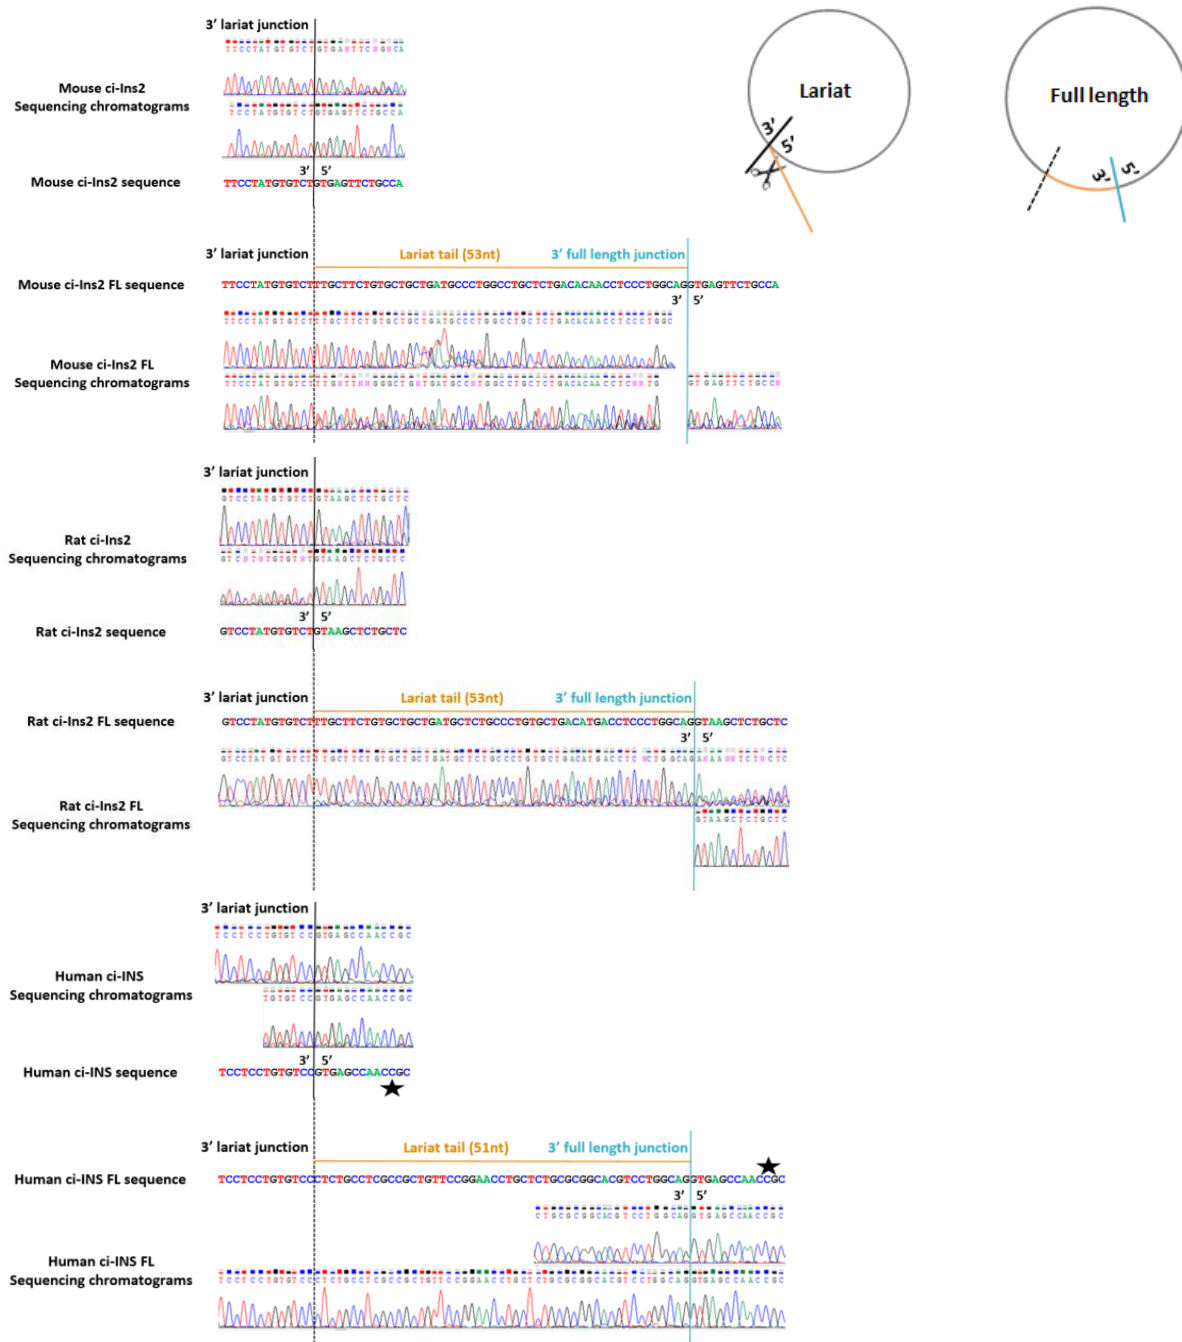

**Supplementary Fig. 2 | Lariat- and full length-derived ci-Ins2 and ci-INS sequences.**

Chromatograms of two independent Sanger sequencings as well as genomic sequences of intron 2 lariat- and full length (FL)-derived mouse and rat ci-Ins2 and of human ci-INS. \***T** in genomic sequence. The scheme represents the lariat- and FL-derived ci-Ins2/ci-INS sequences. The lariat tail, which is trimmed during lariat splicing but retained in the full-length sequence, is shown in orange; the canonical intron junction is displayed in blue.

**Supplementary Table 1 | Predicted circRNAs derived from key  $\beta$ -cell genes.**

\* Total number of back splice spanning reads.

\*\*circRNA/mRNA ratio indicates the average ratio of circRNA expression relative to the linear expression of the host gene, calculated as:  $2 * \text{BSJ-reads} / (2 * \text{BSJ-reads} + \text{linear-reads})$ . 1 =100% circular, 0 = 0% circular.

| circRNA_parent gene | Chromosome | Start     | End       | Junction reads* | Antisense gene | circRNA type | circRNA/mRNA ratio** |
|---------------------|------------|-----------|-----------|-----------------|----------------|--------------|----------------------|
| circ_08584_Ins1     | chr19      | 52264648  | 52264853  | 2996143         | Ins1           | exon         | 3.06E-06             |
| circ_25207_Ins1     | chr19      | 52264807  | 52264991  | 2928280         | Ins1           | exon         | 1.37E-06             |
| circ_03986_Ins2     | chr7       | 142678859 | 142679346 | 52733           | .              | intron       | 3.93E-04             |
| circ_13543_Ins2     | chr7       | 142678903 | 142679346 | 42011           | .              | intron       | 1.35E-04             |
| circ_11718_Ins2     | chr7       | 142678915 | 142679346 | 39218           | .              | intron       | 2.55E-04             |
| circ_07027_Chga     | chr12      | 102562758 | 102563073 | 308983          | .              | exon         | 5.18E-05             |
| circ_02192_Chga     | chr12      | 102561344 | 102563073 | 170443          | .              | exon         | 1.40E-04             |
| circ_27528_Chga     | chr12      | 102564794 | 102564964 | 2               | Chga           | exon         | 1.21E-05             |
| circ_27531_Chga     | chr12      | 102562800 | 102563073 | 2               | .              | exon         | 1.14E-05             |
| circ_12242_Chga     | chr12      | 102558465 | 102563073 | 2               | .              | exon         | 1.41E-05             |
| circ_24998_Chgb     | chr2       | 132793357 | 132793683 | 31570           | .              | exon         | 1.27E-04             |
| circ_09621_Gck      | chr11      | 5906476   | 5906778   | 2313            | .              | exon         | 6.87E-03             |
| circ_10818_Gck      | chr11      | 5906476   | 5911024   | 1985            | .              | exon         | 3.01E-03             |
| circ_06464_Glp1r    | chr17      | 30924500  | 30931287  | 9960            | .              | exon         | 8.03E-04             |
| circ_07242_Glp1r    | chr17      | 30918879  | 30924654  | 5813            | .              | exon         | 1.12E-03             |
| circ_00791_Glp1r    | chr17      | 30916216  | 30919462  | 4937            | .              | intron       | 1.77E-02             |
| circ_26918_Pcsk1    | chr13      | 75125849  | 75127943  | 15799           | .              | exon         | 2.53E-04             |
| circ_11409_Pcsk1    | chr13      | 75097900  | 75112754  | 13723           | .              | exon         | 5.96E-04             |
| circ_00025_Pcsk2    | chr2       | 143687563 | 143696694 | 91618           | .              | exon         | 1.38E-02             |
| circ_07537_Pcsk2    | chr2       | 143749124 | 143801231 | 86958           | Pcsk2os2       | exon         | 8.46E-05             |
| circ_11959_Pcsk2    | chr2       | 143749124 | 143784703 | 86274           | Pcsk2os2       | exon         | 4.64E-05             |
| circ_04004_Pcsk2    | chr2       | 143687563 | 143690435 | 86141           | .              | exon         | 2.55E-04             |
| circ_04699_Pcsk2    | chr2       | 143687563 | 143773989 | 85512           | Pcsk2os2       | exon         | 1.16E-04             |
| circ_00541_Pcsk2    | chr2       | 143687563 | 143749201 | 85226           | Pcsk2os2       | exon         | 1.08E-03             |
| circ_12809_Pcsk2    | chr2       | 143784527 | 143813532 | 77545           | Pcsk2os2       | exon         | 7.74E-05             |
| circ_08211_Pcsk2    | chr2       | 143784527 | 143801231 | 76932           | Pcsk2os2       | exon         | 4.71E-05             |
| circ_03036_Pcsk2    | chr2       | 143773900 | 143801231 | 75521           | Pcsk2os2       | exon         | 2.43E-04             |
| circ_09427_Pcsk2    | chr2       | 143793088 | 143801231 | 68100           | .              | exon         | 8.79E-05             |
| circ_24972_Pcsk2    | chr2       | 143801003 | 143813532 | 65197           | .              | exon         | 6.13E-05             |
| circ_19800_Pcsk2    | chr2       | 143773900 | 143784747 | 40097           | Pcsk2os2       | intron       | 1.50E-04             |
| circ_24977_Pcsk2    | chr2       | 143609324 | 143610894 | 93              | .              | intron       | 4.12E-02             |
| circ_06440_Pcsk2    | chr2       | 143687563 | 143705295 | 6               | .              | intron       | 2.43E-04             |
| circ_12808_Pcsk2    | chr2       | 143793088 | 143813532 | 5               | .              | exon         | 1.15E-04             |
| circ_09429_Pcsk2    | chr2       | 143571399 | 143573547 | 4               | .              | intron       | 1.57E-04             |
| circ_24973_Pcsk2    | chr2       | 143784527 | 143796044 | 2               | Pcsk2os2       | exon         | 4.48E-05             |
| circ_15302_Pcsk2    | chr2       | 143795943 | 143801231 | 2               | .              | exon         | 4.50E-05             |
| circ_14161_Slc30a8  | chr15      | 52295838  | 52321852  | 36792           | .              | exon         | 1.09E-04             |
| circ_03692_Slc30a8  | chr15      | 52317274  | 52325710  | 25047           | .              | exon         | 6.31E-04             |
| circ_08283_Slc30a8  | chr15      | 52321698  | 52322586  | 12384           | .              | intron       | 7.08E-04             |
| circ_12123_Slc30a8  | chr15      | 52316247  | 52325710  | 2               | .              | intron       | 2.56E-04             |

Supplementary Table 2 | Relative number of copies in rodent islet cells.

| <b>circRNA/gene</b> | <b>Nb of copies (per ng of RNA)</b> |
|---------------------|-------------------------------------|
| ci-Ins2             | 4.71E+02                            |
| ciRS-7              | 2.24E+01                            |
| circHIPK3           | 2.73E+03                            |
| <i>Ins2</i>         | 2.62E+06                            |
| <i>Rapgef4</i>      | 5.28E+02                            |
| <i>Syt7</i>         | 2.40E+02                            |
| <i>Unc13a</i>       | 1.36E+03                            |

**Supplementary Table 3 | Predicted binding sites of microRNAs in ci-Ins2 and ci-INS sequences.**

Lariat ci-Ins2 and ci-INS sequences are shown in the Fig. 1b sheet of the Excel Source Data file.

| Sequence      | Start | End | miRNA        | Seed match |
|---------------|-------|-----|--------------|------------|
| rat ci-Ins2   | 202   | 208 | miR-100-5p   | ACGGGT     |
| human ci-INS  | 17    | 23  | miR-103-3p   | TGCTGC     |
| human ci-INS  | 117   | 123 | miR-106b-5p  | CACTTT     |
| human ci-INS  | 17    | 23  | miR-107-3p   | TGCTGC     |
| human ci-INS  | 361   | 367 | miR-10a-5p   | CAGGGT     |
| human ci-INS  | 361   | 367 | miR-10b-5p   | CAGGGT     |
| mouse ci-Ins2 | 181   | 187 | miR-124-3p   | TGCCTT     |
| human ci-INS  | 414   | 420 | miR-1249-3p  | AGGGCG     |
| human ci-INS  | 530   | 536 | miR-125a-3p  | CACCTG     |
| mouse ci-Ins2 | 352   | 358 | miR-125a-3p  | CACCTG     |
| rat ci-Ins2   | 400   | 406 | miR-125a-5p  | TCAGGG     |
| rat ci-Ins2   | 400   | 406 | miR-125b-5p  | TCAGGG     |
| human ci-INS  | 547   | 553 | miR-128-3p   | ACTGTG     |
| human ci-INS  | 703   | 709 | miR-128-3p   | ACTGTG     |
| human ci-INS  | 717   | 723 | miR-128-3p   | ACTGTG     |
| human ci-INS  | 682   | 688 | miR-129-2-3p | AGGGCT     |
| human ci-INS  | 115   | 121 | miR-130a-3p  | TGCACT     |
| rat ci-Ins2   | 254   | 260 | miR-130a-3p  | TGCACT     |
| mouse ci-Ins2 | 267   | 273 | miR-130a-3p  | TGCACT     |
| human ci-INS  | 115   | 121 | miR-130b-3p  | TGCACT     |
| rat ci-Ins2   | 254   | 260 | miR-130b-3p  | TGCACT     |
| mouse ci-Ins2 | 267   | 273 | miR-130b-3p  | TGCACT     |
| rat ci-Ins2   | 334   | 340 | miR-135a-5p  | AGCCAT     |
| human ci-INS  | 708   | 714 | miR-139-3p   | GTCTCC     |
| rat ci-Ins2   | 187   | 193 | miR-139-3p   | GTCTCC     |
| human ci-INS  | 602   | 608 | miR-139-5p   | CTGTAG     |
| human ci-INS  | 322   | 328 | miR-141-3p   | AGTGTT     |
| human ci-INS  | 490   | 496 | miR-141-5p   | GAAGAT     |
| mouse ci-Ins2 | 277   | 283 | miR-141-5p   | GAAGAT     |
| rat ci-Ins2   | 425   | 431 | miR-145a-5p  | ACTGGA     |
| mouse ci-Ins2 | 414   | 420 | miR-145a-5p  | ACTGGA     |
| human ci-INS  | 134   | 140 | miR-146a-5p  | GTTCTC     |
| human ci-INS  | 134   | 140 | miR-146b-5p  | GTTCTC     |
| human ci-INS  | 701   | 707 | miR-148a-3p  | GCACTG     |
| rat ci-Ins2   | 250   | 256 | miR-148a-3p  | GCACTG     |
| rat ci-Ins2   | 255   | 261 | miR-148a-3p  | GCACTG     |
| mouse ci-Ins2 | 263   | 269 | miR-148a-3p  | GCACTG     |
| mouse ci-Ins2 | 268   | 274 | miR-148a-3p  | GCACTG     |
| human ci-INS  | 701   | 707 | miR-148b-3p  | GCACTG     |
| rat ci-Ins2   | 250   | 256 | miR-148b-3p  | GCACTG     |
| rat ci-Ins2   | 255   | 261 | miR-148b-3p  | GCACTG     |
| mouse ci-Ins2 | 263   | 269 | miR-148b-3p  | GCACTG     |
| mouse ci-Ins2 | 268   | 274 | miR-148b-3p  | GCACTG     |
| human ci-INS  | 668   | 674 | miR-150-5p   | TGGGAG     |
| human ci-INS  | 701   | 707 | miR-152-3p   | GCACTG     |
| rat ci-Ins2   | 250   | 256 | miR-152-3p   | GCACTG     |

|               |     |     |              |        |
|---------------|-----|-----|--------------|--------|
| rat ci-Ins2   | 255 | 261 | miR-152-3p   | GCACTG |
| mouse ci-Ins2 | 263 | 269 | miR-152-3p   | GCACTG |
| mouse ci-Ins2 | 268 | 274 | miR-152-3p   | GCACTG |
| human ci-INS  | 638 | 644 | miR-154-5p   | TAACCT |
| mouse ci-Ins2 | 355 | 361 | miR-17-3p    | CTGCAG |
| human ci-INS  | 117 | 123 | miR-17-5p    | CACTTT |
| rat ci-Ins2   | 265 | 271 | miR-188-5p   | AGGGAT |
| rat ci-Ins2   | 55  | 61  | miR-1894-3p  | CCCTTG |
| rat ci-Ins2   | 344 | 350 | miR-1894-3p  | CCCTTG |
| human ci-INS  | 74  | 80  | miR-1904     | GCAGAA |
| human ci-INS  | 17  | 23  | miR-1906     | TGCTGC |
| human ci-INS  | 322 | 328 | miR-200a-3p  | AGTGTT |
| human ci-INS  | 117 | 123 | miR-20a-5p   | CACTTT |
| human ci-INS  | 117 | 123 | miR-20b-5p   | CACTTT |
| rat ci-Ins2   | 1   | 7   | miR-21a-5p   | TAAGCT |
| rat ci-Ins2   | 257 | 263 | miR-223-3p   | ACTGAC |
| mouse ci-Ins2 | 270 | 276 | miR-223-3p   | ACTGAC |
| human ci-INS  | 466 | 472 | miR-22-3p    | GCAGCT |
| rat ci-Ins2   | 129 | 135 | miR-22-3p    | GCAGCT |
| mouse ci-Ins2 | 154 | 160 | miR-22-3p    | GCAGCT |
| mouse ci-Ins2 | 217 | 223 | miR-23a-3p   | ATGTGA |
| mouse ci-Ins2 | 217 | 223 | miR-23b-3p   | ATGTGA |
| human ci-INS  | 1   | 7   | miR-24-3p    | TGAGCC |
| human ci-INS  | 548 | 554 | miR-27a-3p   | CTGTGA |
| human ci-INS  | 548 | 554 | miR-27b-3p   | CTGTGA |
| human ci-INS  | 48  | 54  | miR-28a-5p   | GCTCCT |
| human ci-INS  | 245 | 251 | miR-28a-5p   | GCTCCT |
| rat ci-Ins2   | 9   | 15  | miR-28a-5p   | GCTCCT |
| rat ci-Ins2   | 415 | 421 | miR-28a-5p   | GCTCCT |
| human ci-INS  | 116 | 122 | miR-291a-3p  | GCACTT |
| human ci-INS  | 303 | 309 | miR-291a-5p  | TTTGAT |
| mouse ci-Ins2 | 250 | 256 | miR-296-5p   | GGGCCC |
| rat ci-Ins2   | 5   | 11  | miR-298-5p   | CTCTGC |
| rat ci-Ins2   | 398 | 404 | miR-29a-5p   | AATCAG |
| rat ci-Ins2   | 103 | 109 | miR-29b-1-5p | AACCAG |
| mouse ci-Ins2 | 102 | 108 | miR-29b-1-5p | AACCAG |
| mouse ci-Ins2 | 48  | 54  | miR-300-5p   | TCTTCA |
| human ci-INS  | 115 | 121 | miR-301a-3p  | TGCACT |
| rat ci-Ins2   | 254 | 260 | miR-301a-3p  | TGCACT |
| mouse ci-Ins2 | 267 | 273 | miR-301a-3p  | TGCACT |
| human ci-INS  | 115 | 121 | miR-301b-3p  | TGCACT |
| rat ci-Ins2   | 254 | 260 | miR-301b-3p  | TGCACT |
| mouse ci-Ins2 | 267 | 273 | miR-301b-3p  | TGCACT |
| rat ci-Ins2   | 22  | 28  | miR-30b-3p   | ATCCCA |
| mouse ci-Ins2 | 227 | 233 | miR-30b-3p   | ATCCCA |
| human ci-INS  | 58  | 64  | miR-30c-1-3p | CTCCCA |
| human ci-INS  | 542 | 548 | miR-30c-1-3p | CTCCCA |
| human ci-INS  | 58  | 64  | miR-30c-2-3p | CTCCCA |
| human ci-INS  | 542 | 548 | miR-30c-2-3p | CTCCCA |
| rat ci-Ins2   | 346 | 352 | miR-31-5p    | CTTGCC |

|               |     |     |             |        |
|---------------|-----|-----|-------------|--------|
| human ci-INS  | 437 | 443 | miR-328-3p  | GGGCCA |
| human ci-INS  | 103 | 109 | miR-331-3p  | CAGGGG |
| rat ci-Ins2   | 368 | 374 | miR-331-3p  | CAGGGG |
| rat ci-Ins2   | 401 | 407 | miR-331-3p  | CAGGGG |
| mouse ci-Ins2 | 358 | 364 | miR-331-3p  | CAGGGG |
| human ci-INS  | 137 | 143 | miR-335-5p  | CTCTTG |
| human ci-INS  | 495 | 501 | miR-338-3p  | TGCTGG |
| human ci-INS  | 40  | 46  | miR-342-5p  | CACCCC |
| human ci-INS  | 394 | 400 | miR-342-5p  | CACCCC |
| mouse ci-Ins2 | 224 | 230 | miR-344-3p  | TAGATC |
| human ci-INS  | 108 | 114 | miR-345-5p  | GGTCAG |
| human ci-INS  | 8   | 14  | miR-34a-5p  | ACTGCC |
| human ci-INS  | 8   | 14  | miR-34b-5p  | ACTGCC |
| human ci-INS  | 8   | 14  | miR-34c-5p  | ACTGCC |
| human ci-INS  | 101 | 107 | miR-370-3p  | AGCAGG |
| rat ci-Ins2   | 366 | 372 | miR-370-3p  | AGCAGG |
| rat ci-Ins2   | 436 | 442 | miR-376c-3p | CTATGT |
| mouse ci-Ins2 | 425 | 431 | miR-376c-3p | CTATGT |
| human ci-INS  | 646 | 652 | miR-378a-3p | GTCCAG |
| human ci-INS  | 478 | 484 | miR-378a-5p | TCAGGA |
| human ci-INS  | 262 | 268 | miR-423-5p  | CCCCTC |
| rat ci-Ins2   | 311 | 317 | miR-433-3p  | TCATGA |
| rat ci-Ins2   | 115 | 121 | miR-455-5p  | GCACAT |
| rat ci-Ins2   | 281 | 287 | miR-466i-3p | TGTGTA |
| human ci-INS  | 190 | 196 | miR-484     | AGCCTG |
| rat ci-Ins2   | 388 | 394 | miR-484     | AGCCTG |
| rat ci-Ins2   | 49  | 55  | miR-488-3p  | CTTTCA |
| human ci-INS  | 327 | 333 | miR-495-3p  | TTTGTT |
| human ci-INS  | 540 | 546 | miR-505-5p  | GGCTCC |
| human ci-INS  | 668 | 674 | miR-532-3p  | TGGGAG |
| mouse ci-Ins2 | 335 | 341 | miR-532-5p  | AGGCAT |
| human ci-INS  | 289 | 295 | miR-539-5p  | TTTCTC |
| human ci-INS  | 218 | 224 | miR-542-5p  | CCCCGA |
| human ci-INS  | 156 | 162 | miR-668-3p  | AGTGAC |
| rat ci-Ins2   | 319 | 325 | miR-668-3p  | AGTGAC |
| mouse ci-Ins2 | 320 | 326 | miR-668-3p  | AGTGAC |
| mouse ci-Ins2 | 105 | 111 | miR-670-5p  | CAGGGA |
| human ci-INS  | 196 | 202 | miR-676-3p  | AGGACG |
| human ci-INS  | 220 | 226 | miR-678     | CCGAGA |
| rat ci-Ins2   | 278 | 284 | miR-697     | GGATGT |
| human ci-INS  | 289 | 295 | miR-706     | TTTCTC |
| human ci-INS  | 380 | 386 | miR-709     | TGCCTC |
| rat ci-Ins2   | 348 | 354 | miR-709     | TGCCTC |
| human ci-INS  | 572 | 578 | miR-712-5p  | GAAGGA |
| rat ci-Ins2   | 163 | 169 | miR-712-5p  | GAAGGA |
| human ci-INS  | 115 | 121 | miR-721     | TGCACT |
| rat ci-Ins2   | 254 | 260 | miR-721     | TGCACT |
| mouse ci-Ins2 | 267 | 273 | miR-721     | TGCACT |
| human ci-INS  | 277 | 283 | miR-744-5p  | CCCCGC |
| human ci-INS  | 215 | 221 | miR-762     | CAGCCC |



|              |     |     |             |        |
|--------------|-----|-----|-------------|--------|
| human ci-INS | 282 | 288 | miR-762     | CAGCCC |
| human ci-INS | 649 | 655 | miR-762     | CAGCCC |
| human ci-INS | 327 | 333 | miR-7a-1-3p | TTTGTT |
| human ci-INS | 638 | 644 | miR-872-5p  | TAACCT |
| human ci-INS | 195 | 201 | miR-877-3p  | GAGGAC |
| human ci-INS | 117 | 123 | miR-93-5p   | CACTTT |
| rat ci-Ins2  | 202 | 208 | miR-99a-5p  | ACGGGT |
| rat ci-Ins2  | 202 | 208 | miR-99b-5p  | ACGGGT |

**Supplementary Table 4 | microRNAs targeting genes differentially expressed after ci-Ins2 or ci-INS inhibition.**

The analyzed genes are shown in Fig. 6

The hypergeometric test  $p$  value was obtained by using the Enrichr webserver.

| Term             | $p$ value | Adjusted $p$ value | Z-score | Combined score | Genes                                 |
|------------------|-----------|--------------------|---------|----------------|---------------------------------------|
| hsa-miR-1273c    | 0.0261    | 0.20               | -0.55   | 2.01           | SLC12A5;SYT7                          |
| hsa-miR-1306     | 0.0350    | 0.22               | -0.64   | 2.14           | MIDN;SYT7                             |
| hsa-miR-139-3p   | 0.0261    | 0.20               | -1.23   | 4.48           | SLC12A5;GIPR;SYT7                     |
| hsa-miR-184      | 0.0153    | 0.15               | -1.22   | 5.08           | SLC12A5;UNC13A;SIK1                   |
| hsa-miR-1908     | 0.0015    | 0.10               | -3.21   | 20.87          | MIDN;SLC12A5;UNC13A;SIK1;CACNA1D;SYT7 |
| hsa-miR-3135     | 0.0360    | 0.22               | -2.39   | 7.95           | SYT4;PCLO;SIK1;MICU1                  |
| hsa-miR-3141     | 0.0259    | 0.20               | -1.30   | 4.75           | MIDN;UNC13A;CACNA1D                   |
| hsa-miR-3178     | 0.0195    | 0.16               | -1.24   | 4.89           | MIDN;SLC12A5;UNC13A                   |
| hsa-miR-3180     | 0.0035    | 0.10               | -2.36   | 13.36          | MIDN;SLC12A5;SIK1;MICU1;SYT7          |
| hsa-miR-3180-3p  | 0.0035    | 0.10               | -2.35   | 13.33          | MIDN;SLC12A5;SIK1;MICU1;SYT7          |
| hsa-miR-3196     | 0.0035    | 0.10               | -2.35   | 13.30          | MIDN;SLC12A5;SIK1;MICU1;SYT7          |
| hsa-miR-3681     | 0.0315    | 0.22               | -2.29   | 7.92           | SYT4;PCLO;PLD1;RAPGEF4                |
| hsa-miR-3689a-5p | 0.0095    | 0.12               | -2.95   | 13.72          | SYT4;SLC12A5;PCLO;CACNA1D;MICU1       |
| hsa-miR-3689b    | 0.0095    | 0.12               | -2.94   | 13.70          | SYT4;SLC12A5;PCLO;CACNA1D;MICU1       |
| hsa-miR-3689e    | 0.0095    | 0.12               | -2.93   | 13.66          | SYT4;SLC12A5;PCLO;CACNA1D;MICU1       |
| hsa-miR-3689f    | 0.0095    | 0.12               | -2.93   | 13.63          | SYT4;SLC12A5;PCLO;CACNA1D;MICU1       |
| hsa-miR-383      | 0.0115    | 0.13               | -2.96   | 13.20          | RIMS2;PCLO;UNC13A;PLD1;SYT7           |
| hsa-miR-3960     | 0.0475    | 0.22               | -0.44   | 1.34           | MIDN;SLC12A5                          |
| hsa-miR-4258     | 0.0015    | 0.10               | -2.01   | 13.14          | RIMS2;MIDN;UNC13A;GIPR;SYT7           |
| hsa-miR-4259     | 0.0119    | 0.13               | -3.07   | 13.58          | RIMS2;PCLO;UNC13A;CACNA1D;SYT7        |
| hsa-miR-4280     | 0.0286    | 0.21               | -2.23   | 7.93           | RIMS2;PCLO;UNC13A;CACNA1D             |
| hsa-miR-4317     | 0.0436    | 0.22               | -2.49   | 7.79           | SLC12A5;PCLO;SIK1;CACNA1D             |
| hsa-miR-4508     | 0.0078    | 0.11               | -1.79   | 8.67           | MIDN;SLC12A5;UNC13A;SYT7              |
| hsa-miR-4535     | 0.0166    | 0.16               | -2.03   | 8.32           | RIMS2;SLC12A5;PCLO;SIK1               |
| hsa-miR-4632     | 0.0031    | 0.10               | -1.63   | 9.41           | MIDN;SLC12A5;SIK1;SYT7                |
| hsa-miR-4640-3p  | 0.0405    | 0.22               | -2.52   | 8.09           | MIDN;SLC12A5;GIPR;SYT7                |
| hsa-miR-4655-5p  | 0.0497    | 0.22               | -0.30   | 0.90           | MIDN;SLC12A5                          |
| hsa-miR-4665-3p  | 0.0285    | 0.21               | -0.58   | 2.08           | SLC12A5;UNC13A                        |

|                 |        |      |       |       |                                       |
|-----------------|--------|------|-------|-------|---------------------------------------|
| hsa-miR-4694-5p | 0.0478 | 0.22 | -2.60 | 7.90  | RIMS2;SLC12A5;UNC13A;SIK1             |
| hsa-miR-4707-5p | 0.0474 | 0.22 | -1.25 | 3.82  | SLC12A5;UNC13A;SYT7                   |
| hsa-miR-4715-5p | 0.0290 | 0.21 | -2.34 | 8.27  | RIMS2;PCLO;UNC13A;GIPR                |
| hsa-miR-4727-3p | 0.0266 | 0.20 | -2.19 | 7.96  | PCLO;CACNA1D;PLD1;RAPGEF4             |
| hsa-miR-4737    | 0.0046 | 0.11 | -1.24 | 6.69  | MIDN;CACNA1D;MICU1                    |
| hsa-miR-4759    | 0.0368 | 0.22 | -2.34 | 7.74  | RIMS2;PCLO;PLD1;SYT7                  |
| hsa-miR-4776-5p | 0.0236 | 0.19 | -2.20 | 8.24  | RIMS2;SLC12A5;PCLO;SIK1               |
| hsa-miR-4787-5p | 0.0319 | 0.22 | -1.34 | 4.62  | MIDN;UNC13A;SYT7                      |
| hsa-miR-483-5p  | 0.0444 | 0.22 | -1.38 | 4.30  | SLC12A5;UNC13A;SYT7                   |
| hsa-miR-492     | 0.0096 | 0.12 | -2.96 | 13.78 | MIDN;SLC12A5;PCLO;CACNA1D;SYT7        |
| hsa-miR-501-3p  | 0.0479 | 0.22 | -2.54 | 7.73  | RIMS2;UNC13A;GIPR;SYT7                |
| hsa-miR-502-3p  | 0.0479 | 0.22 | -2.54 | 7.71  | RIMS2;UNC13A;GIPR;SYT7                |
| hsa-miR-503     | 0.0454 | 0.22 | -2.50 | 7.73  | MIDN;SLC12A5;UNC13A;SIK1              |
| hsa-miR-518a-3p | 0.0471 | 0.22 | -0.49 | 1.49  | SLC12A5;UNC13A                        |
| hsa-miR-518b    | 0.0471 | 0.22 | -0.48 | 1.47  | SLC12A5;UNC13A                        |
| hsa-miR-518c    | 0.0471 | 0.22 | -0.47 | 1.44  | SLC12A5;UNC13A                        |
| hsa-miR-518d-3p | 0.0471 | 0.22 | -0.46 | 1.41  | SLC12A5;UNC13A                        |
| hsa-miR-518f    | 0.0471 | 0.22 | -0.45 | 1.39  | SLC12A5;UNC13A                        |
| hsa-miR-524-3p  | 0.0462 | 0.22 | -0.43 | 1.33  | UNC13A;SYT7                           |
| hsa-miR-525-3p  | 0.0462 | 0.22 | -0.42 | 1.30  | UNC13A;SYT7                           |
| hsa-miR-556-5p  | 0.0428 | 0.22 | -2.43 | 7.64  | SLC12A5;PCLO;SIK1;MICU1               |
| hsa-miR-566     | 0.0258 | 0.20 | -1.33 | 4.88  | SLC12A5;UNC13A;SYT7                   |
| hsa-miR-602     | 0.0034 | 0.10 | -1.62 | 9.18  | MIDN;SLC12A5;GIPR;MICU1               |
| hsa-miR-639     | 0.0069 | 0.11 | -1.19 | 5.93  | MIDN;CACNA1D;SYT7                     |
| hsa-miR-663     | 0.0015 | 0.10 | -3.20 | 20.83 | MIDN;SLC12A5;UNC13A;SIK1;CACNA1D;SYT7 |
| hsa-miR-718     | 0.0401 | 0.22 | -0.49 | 1.57  | SLC12A5;GIPR                          |
| hsa-miR-720     | 0.0363 | 0.22 | -1.34 | 4.45  | MIDN;GIPR;CACNA1D                     |
| hsa-miR-744     | 0.0019 | 0.10 | -2.18 | 13.66 | MIDN;SLC12A5;UNC13A;CACNA1D;SYT7      |
| hsa-miR-934     | 0.0005 | 0.09 | -2.47 | 18.78 | SYT4;SLC12A5;PCLO;SIK1;PLD1;SYT7      |
| hsa-miR-937     | 0.0002 | 0.05 | -1.21 | 10.41 | SLC12A5;UNC13A;SYT7                   |
| mmu-miR-1193-5p | 0.0155 | 0.15 | -1.98 | 8.24  | MIDN;UNC13A;SIK1;SYT7                 |
| mmu-miR-122     | 0.0494 | 0.22 | -2.51 | 7.56  | SLC12A5;UNC13A;MICU1;SYT7             |
| mmu-miR-1298    | 0.0072 | 0.11 | -2.77 | 13.69 | RIMS2;PCLO;ATP1B3;ATP1A1;RAPGEF4      |

|                   |        |      |       |       |                                      |
|-------------------|--------|------|-------|-------|--------------------------------------|
| mmu-miR-133a      | 0.0495 | 0.22 | -2.43 | 7.31  | RIMS2;PCLO;UNC13A;PLD1               |
| mmu-miR-133b      | 0.0495 | 0.22 | -2.43 | 7.29  | RIMS2;PCLO;UNC13A;PLD1               |
| mmu-miR-137       | 0.0126 | 0.14 | -3.14 | 13.73 | RIMS2;SLC12A5;PCLO;SIK1;CACNA1D      |
| mmu-miR-155       | 0.0056 | 0.11 | -2.57 | 13.35 | RIMS2;MIDN;PCLO;PLD1;RAPGEF4         |
| mmu-miR-183       | 0.0099 | 0.12 | -2.81 | 12.98 | SLC12A5;PCLO;SIK1;SYT7;RAPGEF4       |
| mmu-miR-1839-3p   | 0.0073 | 0.11 | -1.79 | 8.82  | RIMS2;PCLO;GIPR;SIK1                 |
| mmu-miR-188-5p    | 0.0053 | 0.11 | -2.57 | 13.45 | RIMS2;UNC13A;ATP1B3;CACNA1D;PLD1     |
| mmu-miR-1895      | 0.0135 | 0.14 | -1.17 | 5.06  | RIMS2;SIK1;RAPGEF4                   |
| mmu-miR-18a       | 0.0064 | 0.11 | -2.66 | 13.43 | RIMS2;PCLO;MICU1;SYT7;RAPGEF4        |
| mmu-miR-18b       | 0.0064 | 0.11 | -2.65 | 13.40 | RIMS2;PCLO;MICU1;SYT7;RAPGEF4        |
| mmu-miR-192       | 0.0029 | 0.10 | -2.35 | 13.77 | PCLO;UNC13A;GIPR;SIK1;SYT7           |
| mmu-miR-1941-3p   | 0.0071 | 0.11 | -2.77 | 13.74 | RIMS2;SYT4;CACNA1D;PLD1;RAPGEF4      |
| mmu-miR-1946a     | 0.0083 | 0.12 | -1.19 | 5.69  | SLC12A5;CACNA1D;SYT7                 |
| mmu-miR-1951      | 0.0107 | 0.12 | -1.73 | 7.86  | PCLO;PLD1;SYT7;RAPGEF4               |
| mmu-miR-1957      | 0.0183 | 0.16 | -1.98 | 7.92  | RIMS2;SLC12A5;PCLO;SYT7              |
| mmu-miR-202-5p    | 0.0459 | 0.22 | -2.52 | 7.76  | PCLO;UNC13A;SIK1;RAPGEF4             |
| mmu-miR-210       | 0.0498 | 0.22 | -0.38 | 1.13  | RIMS2;PLD1                           |
| mmu-miR-2137      | 0.0042 | 0.11 | -0.73 | 4.02  | RIMS2;SLC12A5                        |
| mmu-miR-215       | 0.0029 | 0.10 | -2.35 | 13.74 | PCLO;UNC13A;GIPR;SIK1;SYT7           |
| mmu-miR-219-3p    | 0.0026 | 0.10 | -2.22 | 13.17 | SYT4;MIDN;PCLO;UNC13A;SYT7           |
| mmu-miR-25        | 0.0366 | 0.22 | -2.44 | 8.07  | RIMS2;SLC12A5;PCLO;SIK1              |
| mmu-miR-296-5p    | 0.0011 | 0.10 | -3.12 | 21.10 | MIDN;SLC12A5;UNC13A;ATP1B3;PLD1;SYT7 |
| mmu-miR-3070a     | 0.0060 | 0.11 | -2.71 | 13.85 | RIMS2;ATP1A1;MICU1;SYT7;RAPGEF4      |
| mmu-miR-3070b-3p  | 0.0060 | 0.11 | -2.70 | 13.82 | RIMS2;ATP1A1;MICU1;SYT7;RAPGEF4      |
| mmu-miR-3073-3p   | 0.0372 | 0.22 | -2.30 | 7.58  | SLC12A5;PCLO;ATP1B3;PLD1             |
| mmu-miR-3074-1-3p | 0.0056 | 0.11 | -2.58 | 13.35 | MIDN;SLC12A5;PCLO;PLD1;RAPGEF4       |
| mmu-miR-3080-3p   | 0.0032 | 0.10 | -1.61 | 9.26  | SYT4;SLC12A5;UNC13A;SYT7             |
| mmu-miR-3092      | 0.0347 | 0.22 | -2.44 | 8.20  | SLC12A5;PCLO;UNC13A;SYT7             |
| mmu-miR-3093-5p   | 0.0035 | 0.10 | -2.43 | 13.74 | MIDN;UNC13A;GIPR;CACNA1D;SYT7        |
| mmu-miR-3101      | 0.0140 | 0.15 | -1.90 | 8.10  | RIMS2;ATP1B3;CACNA1D;PLD1            |
| mmu-miR-3102-3p,2 | 0.0436 | 0.22 | -2.46 | 7.70  | RIMS2;SYT4;SLC12A5;SIK1              |
| mmu-miR-3103      | 0.0300 | 0.22 | -2.25 | 7.88  | SYT4;SLC12A5;PCLO;CACNA1D            |
| mmu-miR-32        | 0.0366 | 0.22 | -2.43 | 8.04  | RIMS2;SLC12A5;PCLO;SIK1              |

|                   |        |      |       |       |                                          |
|-------------------|--------|------|-------|-------|------------------------------------------|
| mmu-miR-340-3p    | 0.0076 | 0.11 | -1.17 | 5.72  | MIDN;SLC12A5;CACNA1D                     |
| mmu-miR-363-3p    | 0.0366 | 0.22 | -2.43 | 8.02  | RIMS2;SLC12A5;PCLO;SIK1                  |
| mmu-miR-367       | 0.0366 | 0.22 | -2.42 | 8.00  | RIMS2;SLC12A5;PCLO;SIK1                  |
| mmu-miR-379       | 0.0155 | 0.15 | -1.97 | 8.21  | MIDN;UNC13A;SIK1;SYT7                    |
| mmu-miR-3963      | 0.0373 | 0.22 | -1.33 | 4.37  | RIMS2;PCLO;ATP1B3                        |
| mmu-miR-466b-5p   | 0.0438 | 0.22 | -2.46 | 7.71  | RIMS2;PCLO;CACNA1D;RAPGEF4               |
| mmu-miR-466c-5p   | 0.0438 | 0.22 | -2.46 | 7.69  | RIMS2;PCLO;CACNA1D;RAPGEF4               |
| mmu-miR-466o-5p   | 0.0438 | 0.22 | -2.45 | 7.67  | RIMS2;PCLO;CACNA1D;RAPGEF4               |
| mmu-miR-471-5p    | 0.0150 | 0.15 | -0.50 | 2.09  | PCLO;SIK1                                |
| mmu-miR-500       | 0.0182 | 0.16 | -2.05 | 8.22  | MIDN;PCLO;CACNA1D;PLD1                   |
| mmu-miR-501-3p    | 0.0182 | 0.16 | -2.05 | 8.20  | MIDN;PCLO;CACNA1D;PLD1                   |
| mmu-miR-503       | 0.0326 | 0.22 | -2.23 | 7.64  | RIMS2;MIDN;UNC13A;SIK1                   |
| mmu-miR-5103      | 0.0416 | 0.22 | -0.55 | 1.75  | MIDN;UNC13A                              |
| mmu-miR-5128      | 0.0010 | 0.10 | -2.00 | 13.85 | RIMS2;SYT4;MIDN;SLC12A5;UNC13A           |
| mmu-miR-5130      | 0.0103 | 0.12 | -1.73 | 7.93  | RIMS2;MIDN;SLC12A5;SYT7                  |
| mmu-miR-5135      | 0.0112 | 0.13 | -1.86 | 8.37  | SYT4;ATP1B3;PLD1;RAPGEF4                 |
| mmu-miR-615-5p    | 0.0001 | 0.05 | -2.88 | 25.74 | RIMS2;MIDN;UNC13A;GIPR;ATP1B3;MICU1;SYT7 |
| mmu-miR-653       | 0.0345 | 0.22 | -2.39 | 8.04  | RIMS2;SYT4;PCLO;PLD1                     |
| mmu-miR-669a-3-3p | 0.0052 | 0.11 | -2.50 | 13.18 | RIMS2;SYT4;SLC12A5;PCLO;SIK1             |
| mmu-miR-669a-3p   | 0.0052 | 0.11 | -2.50 | 13.14 | RIMS2;SYT4;SLC12A5;PCLO;SIK1             |
| mmu-miR-669a-5p   | 0.0190 | 0.16 | -2.02 | 8.01  | RIMS2;SLC12A5;PCLO;RAPGEF4               |
| mmu-miR-669f-5p   | 0.0190 | 0.16 | -2.01 | 7.98  | RIMS2;SLC12A5;PCLO;RAPGEF4               |
| mmu-miR-669l      | 0.0190 | 0.16 | -2.01 | 7.95  | RIMS2;SLC12A5;PCLO;RAPGEF4               |
| mmu-miR-669o-3p   | 0.0052 | 0.11 | -2.49 | 13.11 | RIMS2;SYT4;SLC12A5;PCLO;SIK1             |
| mmu-miR-669p      | 0.0190 | 0.16 | -2.00 | 7.93  | RIMS2;SLC12A5;PCLO;RAPGEF4               |
| mmu-miR-671-3p    | 0.0267 | 0.20 | -0.56 | 2.01  | UNC13A;GIPR                              |
| mmu-miR-707       | 0.0075 | 0.11 | -2.76 | 13.52 | RIMS2;SYT4;PCLO;SIK1;CACNA1D             |
| mmu-miR-720       | 0.0363 | 0.22 | -0.53 | 1.76  | MIDN;PCLO                                |
| mmu-miR-770-3p    | 0.0442 | 0.22 | -2.55 | 7.96  | SLC12A5;SIK1;PLD1;SYT7                   |
| mmu-miR-880       | 0.0099 | 0.12 | -2.93 | 13.52 | SYT4;SLC12A5;PCLO;PLD1;RAPGEF4           |
| mmu-miR-92a       | 0.0366 | 0.22 | -2.41 | 7.98  | RIMS2;SLC12A5;PCLO;SIK1                  |
| mmu-miR-92b       | 0.0366 | 0.22 | -2.41 | 7.96  | RIMS2;SLC12A5;PCLO;SIK1                  |

**Supplementary Table 5 | Predicted binding sites of transcription factors in ci-Ins2 and ci-INS sequences.**

Lariat ci-Ins2 and ci-INS sequences are shown in the Fig. 1b sheet of the Excel Source Data file.

The sequence match *p* value was calculated with FIMO's dynamic programming algorithm.

| motif_id | motif_alt_id | sequence_name | start | end | <i>p</i> _value | matched_sequence    |
|----------|--------------|---------------|-------|-----|-----------------|---------------------|
| MA0816.1 | Ascl2        | mouse ci-Ins2 | 154   | 163 | 7.64e-06        | ggcagctgcc          |
| MA0461.2 | Atoh1        | rat ci-Ins2   | 137   | 146 | 6.83e-05        | gacatatgta          |
| MA0461.2 | Atoh1        | rat ci-Ins2   | 299   | 308 | 6.44e-05        | cccatatgtc          |
| MA0461.2 | Atoh1        | mouse ci-Ins2 | 139   | 148 | 6.83e-05        | gacatatgta          |
| MA0591.1 | Bach1::Mafk  | rat ci-Ins2   | 357   | 371 | 5.91e-05        | gtgctgacttagcag     |
| MA0462.1 | BATF::JUN    | mouse ci-Ins2 | 165   | 175 | 2.43e-05        | ggaatgagtaa         |
| MA0607.1 | Bhlha15      | rat ci-Ins2   | 300   | 307 | 1.79e-05        | cccatatgt           |
| MA0818.1 | BHLHE22      | rat ci-Ins2   | 299   | 308 | 7.97e-05        | cccatatgtc          |
| MA0817.1 | BHLHE23      | rat ci-Ins2   | 136   | 147 | 4.87e-05        | agacatatgtaa        |
| MA0817.1 | BHLHE23      | mouse ci-Ins2 | 138   | 149 | 4.87e-05        | agacatatgtaa        |
| MA0139.1 | CTCF         | human ci-INS  | 72    | 90  | 1.93e-06        | tgggcagaagggggcagga |
| MA0139.1 | CTCF         | rat ci-Ins2   | 103   | 121 | 5.67e-06        | taaccagtggggggcacat |
| MA0019.1 | Ddit3::Cebpa | mouse ci-Ins2 | 338   | 349 | 1.06e-05        | gcatgcaacccc        |
| MA0470.1 | E2F4         | human ci-INS  | 565   | 575 | 5.3e-05         | gggcgggggaa         |
| MA0470.1 | E2F4         | mouse ci-Ins2 | 370   | 380 | 8.34e-05        | gggcgagaaaa         |
| MA0162.2 | EGR1         | human ci-INS  | 27    | 40  | 1.78e-05        | tggccgccccagc       |
| MA0162.2 | EGR1         | human ci-INS  | 37    | 50  | 1.42e-05        | cagccaccctgc        |
| MA0641.1 | ELF4         | mouse ci-Ins2 | 103   | 114 | 9.67e-05        | aaccaggagtg         |
| MA0760.1 | ERF          | rat ci-Ins2   | 276   | 285 | 6.28e-05        | acaggatgtg          |
| MA0474.2 | ERG          | rat ci-Ins2   | 276   | 285 | 8.52e-05        | acaggatgtg          |
| MA0258.2 | ESR2         | human ci-INS  | 356   | 370 | 7.12e-05        | gggtcacagggtgcc     |
| MA0098.3 | ETS1         | rat ci-Ins2   | 276   | 285 | 5.48e-05        | acaggatgtg          |
| MA0762.1 | ETV2         | rat ci-Ins2   | 275   | 285 | 8.25e-05        | aacaggatgtg         |
| MA0149.1 | EWSR1-FLI1   | human ci-INS  | 564   | 581 | 3.28e-05        | ggggcgggggaaggaggt  |
| MA0820.1 | FIGLA        | human ci-INS  | 529   | 538 | 2.3e-05         | atcacctgtt          |
| MA0478.1 | FOSL2        | mouse ci-Ins2 | 166   | 176 | 9.2e-05         | gaatgagtaag         |
| MA0845.1 | FOXB1        | rat ci-Ins2   | 141   | 151 | 9.99e-07        | tatgtaaacat         |
| MA0845.1 | FOXB1        | mouse ci-Ins2 | 143   | 153 | 9.99e-07        | tatgtaaacat         |

|          |        |               |     |     |          |                   |
|----------|--------|---------------|-----|-----|----------|-------------------|
| MA0032.2 | FOXC1  | rat ci-Ins2   | 141 | 151 | 4.51e-07 | tatgtaaacat       |
| MA0032.2 | FOXC1  | mouse ci-Ins2 | 143 | 153 | 4.51e-07 | tatgtaaacat       |
| MA0846.1 | FOXC2  | rat ci-Ins2   | 141 | 152 | 1.45e-05 | tatgtaaacatg      |
| MA0846.1 | FOXC2  | mouse ci-Ins2 | 143 | 154 | 1.45e-05 | tatgtaaacatg      |
| MA0031.1 | FOXD1  | rat ci-Ins2   | 144 | 151 | 2.18e-05 | gtaaacat          |
| MA0031.1 | FOXD1  | mouse ci-Ins2 | 146 | 153 | 2.18e-05 | gtaaacat          |
| MA0847.1 | FOXD2  | rat ci-Ins2   | 144 | 150 | 7.93e-05 | gtaaaca           |
| MA0847.1 | FOXD2  | mouse ci-Ins2 | 146 | 152 | 7.93e-05 | gtaaaca           |
| MA0613.1 | FOXG1  | rat ci-Ins2   | 144 | 151 | 4.35e-05 | gtaaacat          |
| MA0613.1 | FOXG1  | mouse ci-Ins2 | 146 | 153 | 4.35e-05 | gtaaacat          |
| MA0042.2 | FOXI1  | rat ci-Ins2   | 144 | 150 | 7.93e-05 | gtaaaca           |
| MA0042.2 | FOXI1  | mouse ci-Ins2 | 146 | 152 | 7.93e-05 | gtaaaca           |
| MA0614.1 | Foxj2  | rat ci-Ins2   | 144 | 151 | 8.79e-05 | gtaaacat          |
| MA0614.1 | Foxj2  | mouse ci-Ins2 | 146 | 153 | 8.79e-05 | gtaaacat          |
| MA0852.1 | Foxk1  | rat ci-Ins2   | 139 | 155 | 3.77e-05 | catatgtaaacatggta |
| MA0852.1 | Foxk1  | mouse ci-Ins2 | 141 | 157 | 2.87e-05 | catatgtaaacatggca |
| MA0033.2 | FOXL1  | rat ci-Ins2   | 144 | 150 | 7.93e-05 | gtaaaca           |
| MA0033.2 | FOXL1  | mouse ci-Ins2 | 146 | 152 | 7.93e-05 | gtaaaca           |
| MA0157.2 | FOXO3  | rat ci-Ins2   | 144 | 151 | 4.35e-05 | gtaaacat          |
| MA0157.2 | FOXO3  | mouse ci-Ins2 | 146 | 153 | 4.35e-05 | gtaaacat          |
| MA0848.1 | FOXO4  | rat ci-Ins2   | 144 | 150 | 7.93e-05 | gtaaaca           |
| MA0848.1 | FOXO4  | mouse ci-Ins2 | 146 | 152 | 7.93e-05 | gtaaaca           |
| MA0849.1 | FOXO6  | rat ci-Ins2   | 144 | 150 | 7.93e-05 | gtaaaca           |
| MA0849.1 | FOXO6  | mouse ci-Ins2 | 146 | 152 | 7.93e-05 | gtaaaca           |
| MA0593.1 | FOXP2  | rat ci-Ins2   | 142 | 152 | 8.83e-05 | atgtaaacatg       |
| MA0593.1 | FOXP2  | mouse ci-Ins2 | 144 | 154 | 8.83e-05 | atgtaaacatg       |
| MA0850.1 | FOXP3  | rat ci-Ins2   | 144 | 150 | 7.93e-05 | gtaaaca           |
| MA0850.1 | FOXP3  | mouse ci-Ins2 | 146 | 152 | 7.93e-05 | gtaaaca           |
| MA0483.1 | Gfi1b  | human ci-INS  | 184 | 194 | 2.58e-05 | gaatctcagcc       |
| MA0734.1 | GLI2   | human ci-INS  | 58  | 69  | 8.34e-05 | gctcccaccag       |
| MA0736.1 | GLIS2  | human ci-INS  | 367 | 380 | 7.88e-05 | tgccccacgctgcc    |
| MA1099.1 | Hes1   | human ci-INS  | 241 | 250 | 5.15e-05 | ggcagctcc         |
| MA0907.1 | HOXC13 | rat ci-Ins2   | 65  | 75  | 8.19e-05 | ccttgtaaatt       |

|          |             |               |     |     |          |                       |
|----------|-------------|---------------|-----|-----|----------|-----------------------|
| MA0824.1 | ID4         | mouse ci-Ins2 | 154 | 163 | 8.38e-05 | ggcagctgcc            |
| MA0155.1 | INSM1       | mouse ci-Ins2 | 123 | 134 | 1.83e-05 | tttctgggggaa          |
| MA0489.1 | JUN(var.2)  | mouse ci-Ins2 | 163 | 176 | 7.73e-05 | caggaatgagtaag        |
| MA0490.1 | JUNB        | mouse ci-Ins2 | 166 | 176 | 8.15e-05 | gaatgagtaag           |
| MA0493.1 | Klf1        | human ci-INS  | 609 | 619 | 1.52e-05 | gtccacacca            |
| MA0039.2 | Klf4        | human ci-INS  | 415 | 424 | 4.2e-06  | agggcgtggc            |
| MA0039.2 | Klf4        | human ci-INS  | 564 | 573 | 1.91e-05 | ggggcggggg            |
| MA0599.1 | KLF5        | human ci-INS  | 59  | 68  | 8.04e-05 | ctccaccca             |
| MA0599.1 | KLF5        | human ci-INS  | 246 | 255 | 4.19e-05 | gctcctcct             |
| MA0599.1 | KLF5        | human ci-INS  | 292 | 301 | 7.92e-05 | tctccacct             |
| MA0599.1 | KLF5        | human ci-INS  | 610 | 619 | 3.95e-05 | tccacacca             |
| MA0768.1 | LEF1        | human ci-INS  | 226 | 240 | 7.8e-05  | atacatcagagggtg       |
| MA0705.1 | Lhx8        | rat ci-Ins2   | 397 | 404 | 8.79e-05 | ctaatcag              |
| MA0501.1 | MAF::NFE2   | rat ci-Ins2   | 360 | 374 | 9.44e-05 | ctgacttagcagggg       |
| MA0659.1 | MAFG        | rat ci-Ins2   | 354 | 374 | 1.93e-05 | cctgtgctgacttagcagggg |
| MA0100.2 | Myb         | rat ci-Ins2   | 153 | 162 | 8.95e-05 | gtagctgcca            |
| MA0100.2 | Myb         | mouse ci-Ins2 | 155 | 164 | 6.58e-05 | gcagctgcca            |
| MA0147.2 | Myc         | human ci-INS  | 585 | 594 | 9.33e-05 | acatgtgggc            |
| MA0147.2 | Myc         | mouse ci-Ins2 | 301 | 310 | 4.12e-05 | ccatgtgtcc            |
| MA0499.1 | Myod1       | mouse ci-Ins2 | 154 | 166 | 2.2e-05  | ggcagctgccagg         |
| MA0500.1 | Myog        | mouse ci-Ins2 | 154 | 164 | 1.32e-05 | ggcagctgcca           |
| MA0057.1 | MZF1(var.2) | human ci-INS  | 566 | 575 | 9.52e-05 | ggcgggggaa            |
| MA0668.1 | NEUROD2     | rat ci-Ins2   | 137 | 146 | 7.68e-05 | gacatatgta            |
| MA0668.1 | NEUROD2     | rat ci-Ins2   | 299 | 308 | 6.83e-05 | cccatatgtc            |
| MA0668.1 | NEUROD2     | mouse ci-Ins2 | 139 | 148 | 7.68e-05 | gacatatgta            |
| MA0623.1 | Neurog1     | rat ci-Ins2   | 299 | 308 | 4.88e-05 | cccatatgtc            |
| MA0150.2 | Nfe2l2      | rat ci-Ins2   | 356 | 370 | 5.27e-05 | tgtgctgacttagca       |
| MA0048.2 | NHLH1       | mouse ci-Ins2 | 154 | 163 | 2.38e-05 | ggcagctgcc            |
| MA0494.1 | Nr1h3::Rxra | human ci-INS  | 349 | 367 | 9.5e-05  | tgacctggggtcacagggt   |
| MA0504.1 | NR2C2       | human ci-INS  | 664 | 678 | 9.07e-05 | atgggtgggagtgcg       |
| MA0504.1 | NR2C2       | mouse ci-Ins2 | 360 | 374 | 6.21e-06 | aggggtaaggggcg        |
| MA0017.2 | NR2F1       | human ci-INS  | 105 | 117 | 7.85e-05 | agggggtcaggtg         |
| MA0017.2 | NR2F1       | human ci-INS  | 353 | 365 | 1.06e-05 | ctggggtcacagg         |



|          |                     |               |     |     |          |                       |
|----------|---------------------|---------------|-----|-----|----------|-----------------------|
| MA0677.1 | Nr2f6               | mouse ci-Ins2 | 361 | 374 | 4.95e-05 | ggggttaagggcg         |
| MA0678.1 | OLIG2               | rat ci-Ins2   | 299 | 308 | 8.35e-05 | cccatatgtc            |
| MA0827.1 | OLIG3               | rat ci-Ins2   | 299 | 308 | 6.13e-05 | cccatatgtc            |
| MA0782.1 | PKNOX1              | mouse ci-Ins2 | 153 | 164 | 9.69e-06 | tggcagctgcca          |
| MA0783.1 | PKNOX2              | rat ci-Ins2   | 136 | 147 | 7.32e-05 | agacatatgtaa          |
| MA0783.1 | PKNOX2              | rat ci-Ins2   | 151 | 162 | 6.3e-05  | tggtagctgcca          |
| MA0783.1 | PKNOX2              | mouse ci-Ins2 | 138 | 149 | 7.32e-05 | agacatatgtaa          |
| MA0783.1 | PKNOX2              | mouse ci-Ins2 | 153 | 164 | 6.53e-06 | tggcagctgcca          |
| MA0142.1 | Pou5f1::Sox2        | human ci-INS  | 327 | 341 | 8.66e-05 | ttttgtaagtaaag        |
| MA0066.1 | PPARG               | human ci-INS  | 622 | 641 | 3.92e-05 | gtgggtgaccctccctctaa  |
| MA0508.1 | PRDM1               | rat ci-Ins2   | 375 | 389 | 9.44e-05 | ataaagtgagagaaa       |
| MA0859.1 | Rarg                | human ci-INS  | 355 | 370 | 9.39e-05 | ggggtcacagggtgcc      |
| MA0860.1 | Rarg(var.2)         | human ci-INS  | 345 | 361 | 4.8e-05  | tgggtgacctgggtca      |
| MA0101.1 | REL                 | mouse ci-Ins2 | 417 | 426 | 4.65e-05 | tggattttcc            |
| MA0107.1 | RELA                | mouse ci-Ins2 | 417 | 426 | 3.58e-05 | tggattttcc            |
| MA0138.2 | REST                | human ci-INS  | 466 | 486 | 5.88e-05 | ggcagctccatagtcaggaga |
| MA0138.2 | REST                | rat ci-Ins2   | 210 | 230 | 7.31e-05 | gctaggccccaggataggtac |
| MA0073.1 | RREB1               | human ci-INS  | 33  | 52  | 9.51e-06 | ccccagccaccctgctc     |
| MA0073.1 | RREB1               | human ci-INS  | 264 | 283 | 7.5e-05  | ccctcaacaaatgccccgc   |
| MA0684.1 | RUNX3               | human ci-INS  | 309 | 318 | 6.43e-05 | tgaccgcaga            |
| MA0512.2 | Rxra                | human ci-INS  | 355 | 368 | 9.88e-05 | ggggtcacagggtg        |
| MA0512.2 | Rxra                | mouse ci-Ins2 | 361 | 374 | 2.48e-05 | ggggttaagggcg         |
| MA0074.1 | RXRA::VDR           | human ci-INS  | 356 | 370 | 8.03e-06 | gggtcacagggtgcc       |
| MA0855.1 | RXRB                | human ci-INS  | 355 | 368 | 9.19e-05 | ggggtcacagggtg        |
| MA0855.1 | RXRB                | mouse ci-Ins2 | 361 | 374 | 1.66e-05 | ggggttaagggcg         |
| MA0856.1 | RXRG                | mouse ci-Ins2 | 361 | 374 | 1.94e-05 | ggggttaagggcg         |
| MA0513.1 | SMAD2::SMAD3::SMAD4 | human ci-INS  | 89  | 101 | 2.61e-05 | gaggctgccacc          |
| MA0513.1 | SMAD2::SMAD3::SMAD4 | rat ci-Ins2   | 46  | 58  | 3.4e-05  | ttgtctttcacc          |
| MA0513.1 | SMAD2::SMAD3::SMAD4 | rat ci-Ins2   | 326 | 338 | 2.15e-05 | ttgtctcacagcc         |
| MA0745.1 | SNAI2               | human ci-INS  | 110 | 118 | 7.34e-05 | gtcaggtgc             |
| MA0079.3 | SP1                 | human ci-INS  | 246 | 256 | 1.71e-05 | gctcctccctc           |
| MA0079.3 | SP1                 | human ci-INS  | 292 | 302 | 6.76e-05 | tctccaccctc           |
| MA0516.1 | SP2                 | human ci-INS  | 246 | 260 | 4.34e-05 | gctcctccctccact       |

|          |               |               |     |     |          |                |
|----------|---------------|---------------|-----|-----|----------|----------------|
| MA0746.1 | SP3           | human ci-INS  | 610 | 620 | 6.62e-05 | tccacaccag     |
| MA0686.1 | SPDEF         | rat ci-Ins2   | 275 | 285 | 2.12e-05 | aacagatgtg     |
| MA0687.1 | SPIC          | mouse ci-Ins2 | 165 | 178 | 4.32e-05 | ggaatgagtaagaa |
| MA0111.1 | Spz1          | rat ci-Ins2   | 270 | 280 | 3.8e-05  | atggtaacagg    |
| MA0829.1 | Srebf1(var.2) | human ci-INS  | 529 | 538 | 6.87e-05 | atcacctgtt     |
| MA0828.1 | SREBF2(var.2) | human ci-INS  | 529 | 538 | 9.02e-05 | atcacctgtt     |
| MA0137.3 | STAT1         | rat ci-Ins2   | 157 | 167 | 6.87e-05 | ctgccaggaag    |
| MA0137.3 | STAT1         | mouse ci-Ins2 | 159 | 169 | 7.61e-05 | ctgccaggaat    |
| MA0144.2 | STAT3         | rat ci-Ins2   | 157 | 167 | 2.41e-05 | ctgccaggaag    |
| MA0144.2 | STAT3         | mouse ci-Ins2 | 159 | 169 | 3.41e-05 | ctgccaggaat    |
| MA0518.1 | Stat4         | rat ci-Ins2   | 157 | 170 | 7.07e-06 | ctgccaggaaggag |
| MA0518.1 | Stat4         | mouse ci-Ins2 | 159 | 172 | 4.32e-05 | ctgccaggaatgag |
| MA0803.1 | TBX15         | human ci-INS  | 578 | 585 | 8.34e-05 | aggtggga       |
| MA0689.1 | TBX20         | rat ci-Ins2   | 82  | 92  | 3.47e-05 | taggtgtggag    |
| MA0689.1 | TBX20         | mouse ci-Ins2 | 81  | 91  | 3.47e-05 | taggtgtggag    |
| MA0807.1 | TBX5          | rat ci-Ins2   | 83  | 90  | 7.13e-05 | aggtgtgg       |
| MA0807.1 | TBX5          | mouse ci-Ins2 | 82  | 89  | 7.13e-05 | aggtgtgg       |
| MA0521.1 | Tcf12         | mouse ci-Ins2 | 154 | 164 | 2.13e-05 | ggcagctgcca    |
| MA0522.2 | TCF3          | mouse ci-Ins2 | 351 | 360 | 9.49e-05 | gccacctgca     |
| MA0769.1 | Tcf7          | human ci-INS  | 226 | 237 | 4.25e-05 | atacatcagagg   |
| MA0810.1 | TFAP2A(var.2) | human ci-INS  | 21  | 32  | 7.83e-05 | tgcccctggccg   |
| MA0810.1 | TFAP2A(var.2) | human ci-INS  | 31  | 42  | 7.62e-06 | cgccccagcca    |
| MA0810.1 | TFAP2A(var.2) | human ci-INS  | 381 | 392 | 5.64e-05 | tgctctgggcg    |
| MA0810.1 | TFAP2A(var.2) | human ci-INS  | 558 | 569 | 6.01e-07 | tgccccggggcg   |
| MA0872.1 | TFAP2A(var.3) | mouse ci-Ins2 | 182 | 194 | 3.71e-05 | tgcttaaggggt   |
| MA0811.1 | TFAP2B        | human ci-INS  | 31  | 42  | 2.31e-05 | cgccccagcca    |
| MA0811.1 | TFAP2B        | human ci-INS  | 381 | 392 | 3.83e-05 | tgctctgggcg    |
| MA0811.1 | TFAP2B        | human ci-INS  | 558 | 569 | 7.46e-07 | tgccccggggcg   |
| MA0811.1 | TFAP2B        | mouse ci-Ins2 | 182 | 193 | 7.31e-05 | tgcttaagggg    |
| MA0813.1 | TFAP2B(var.3) | mouse ci-Ins2 | 182 | 194 | 3.93e-05 | tgcttaaggggt   |
| MA0524.2 | TFAP2C        | human ci-INS  | 31  | 42  | 2.7e-05  | cgccccagcca    |
| MA0524.2 | TFAP2C        | human ci-INS  | 381 | 392 | 5.21e-05 | tgctctgggcg    |
| MA0524.2 | TFAP2C        | human ci-INS  | 558 | 569 | 9.5e-07  | tgccccggggcg   |

|          |               |               |     |     |          |                       |
|----------|---------------|---------------|-----|-----|----------|-----------------------|
| MA0524.2 | TFAP2C        | mouse ci-Ins2 | 182 | 193 | 7.34e-05 | tgccctaagggg          |
| MA0815.1 | TFAP2C(var.3) | mouse ci-Ins2 | 182 | 194 | 3.11e-05 | tgccctaaggggt         |
| MA0691.1 | TFAP4         | human ci-INS  | 529 | 538 | 7.63e-05 | atcacctgtt            |
| MA0796.1 | TGIF1         | mouse ci-Ins2 | 153 | 164 | 1.16e-05 | tggcagctgcca          |
| MA0797.1 | TGIF2         | mouse ci-Ins2 | 153 | 164 | 5.79e-06 | tggcagctgcca          |
| MA0597.1 | THAP1         | rat ci-Ins2   | 157 | 165 | 9.23e-05 | ctgccagga             |
| MA0597.1 | THAP1         | mouse ci-Ins2 | 159 | 167 | 9.23e-05 | ctgccagga             |
| MA0633.1 | Twist2        | rat ci-Ins2   | 137 | 146 | 4.75e-05 | gacatatgta            |
| MA0633.1 | Twist2        | rat ci-Ins2   | 299 | 308 | 1.43e-05 | cccatatgtc            |
| MA0633.1 | Twist2        | mouse ci-Ins2 | 139 | 148 | 4.75e-05 | gacatatgta            |
| MA0633.1 | Twist2        | mouse ci-Ins2 | 300 | 309 | 6.98e-05 | cccatgtgtc            |
| MA0093.2 | USF1          | mouse ci-Ins2 | 215 | 225 | 2.7e-05  | gacatgtgact           |
| MA0093.2 | USF1          | mouse ci-Ins2 | 300 | 310 | 5.01e-05 | cccatgtgtcc           |
| MA0526.1 | USF2          | mouse ci-Ins2 | 215 | 225 | 9.18e-06 | gacatgtgact           |
| MA0693.1 | Vdr           | human ci-INS  | 355 | 370 | 1.66e-05 | ggggtcacagggtgcc      |
| MA0095.2 | YY1           | rat ci-Ins2   | 146 | 157 | 6.79e-05 | aaacatggtagc          |
| MA0095.2 | YY1           | mouse ci-Ins2 | 148 | 159 | 1.07e-05 | aaacatggcagc          |
| MA0146.2 | Zfx           | human ci-INS  | 450 | 463 | 8.38e-05 | tgtgccaggcctc         |
| MA0146.2 | Zfx           | human ci-INS  | 592 | 605 | 1.8e-05  | ggcgttggggcctg        |
| MA0696.1 | ZIC1          | human ci-INS  | 41  | 54  | 7.01e-05 | caccccctgtcct         |
| MA0696.1 | ZIC1          | human ci-INS  | 367 | 380 | 4.27e-05 | tgccccacgctgcc        |
| MA0696.1 | ZIC1          | mouse ci-Ins2 | 350 | 363 | 1.88e-05 | tgccacctgcaggg        |
| MA0697.1 | ZIC3          | human ci-INS  | 38  | 52  | 6.84e-05 | agccaccccctgctc       |
| MA0697.1 | ZIC3          | mouse ci-Ins2 | 350 | 364 | 5.32e-05 | tgccacctgcagggg       |
| MA0751.1 | ZIC4          | human ci-INS  | 367 | 381 | 4.2e-05  | tgccccacgctgct        |
| MA0751.1 | ZIC4          | mouse ci-Ins2 | 350 | 364 | 2.44e-05 | tgccacctgcagggg       |
| MA0528.1 | ZNF263        | human ci-INS  | 72  | 92  | 9.07e-06 | tgggcagaagggggcaggagg |
| MA0528.1 | ZNF263        | human ci-INS  | 563 | 583 | 4.05e-05 | cggggcgggggaaggaggtgg |
| MA0528.1 | ZNF263        | human ci-INS  | 564 | 584 | 2.26e-05 | ggggcgggggaaggaggtggg |
| MA0528.1 | ZNF263        | human ci-INS  | 573 | 593 | 3.05e-06 | gaaggaggtgggacatgtggg |
| MA0528.1 | ZNF263        | rat ci-Ins2   | 370 | 390 | 6.04e-05 | aggggataaagtgagagaaag |

**Supplementary Table 6 | Transcription factors targeting genes differentially expressed after ci-Ins2 or ci-INS inhibition.**

The analyzed genes are shown in Fig. 6

The hypergeometric test *p* value was obtained by using the Enrichr webserver.

| Term            | <i>p</i> value | Adjusted <i>p</i> value | Z-score | Combined score | Genes                                  |
|-----------------|----------------|-------------------------|---------|----------------|----------------------------------------|
| EGR1 (mouse)    | 0.0052         | 0.14                    | -1.64   | 8.65           | RIMS2;UNC13A;SIK1;CACNA1D;ATP1A1       |
| FOXA1 (human)   | 0.0200         | 0.28                    | -1.65   | 6.45           | RIMS2;GIPR;ATP1B3;ATP1A1               |
| FOXF1 (human)   | 0.0155         | 0.28                    | -1.69   | 7.02           | RIMS2;SYT4;GIPR;RAPGEF4                |
| GLI2 (human)    | 0.0204         | 0.28                    | -1.58   | 6.13           | MIDN;SLC12A5;CACNA1D;RAPGEF4           |
| MYB (human)     | 0.0179         | 0.28                    | -1.65   | 6.62           | RIMS2;SYT4;PCLO;RAPGEF4                |
| NME2 (human)    | 0.0332         | 0.32                    | -1.79   | 6.09           | RIMS2                                  |
| PCBP1 (human)   | 0.0024         | 0.10                    | -1.73   | 10.44          | RIMS2;SIK1;CACNA1D;ATP1A1;SYT7         |
| RBPJ (human)    | 0.0238         | 0.29                    | -1.63   | 6.08           | RIMS2;PCLO;CACNA1D;ATP1A1              |
| SMAD3 (human)   | 0.0318         | 0.32                    | -1.74   | 6.01           | SYT7                                   |
| SMAD4 (mouse)   | 0.0262         | 0.29                    | -1.50   | 5.48           | RIMS2;ATP1B3;CACNA1D;SYT7              |
| SP1 (human)     | 0.0003         | 0.03                    | -1.75   | 13.97          | RIMS2;MIDN;SIK1;CACNA1D;ATP1A1;SYT7    |
| SP1 (mouse)     | 0.0248         | 0.29                    | -1.47   | 5.45           | RIMS2;MIDN;SIK1;ATP1B3;CACNA1D         |
| SP3 (human)     | 0.0003         | 0.03                    | -1.76   | 14.57          | RIMS2;MIDN;SIK1;CACNA1D;ATP1A1;SYT7    |
| TCFAP2A (human) | 0.0025         | 0.10                    | -1.73   | 10.35          | RIMS2;MIDN;SIK1;CACNA1D;SYT7           |
| TEAD4 (human)   | 0.0156         | 0.28                    | -1.64   | 6.81           | RIMS2;MIDN;SIK1;CACNA1D                |
| TFAP2A (human)  | 0.0393         | 0.34                    | -1.54   | 5.00           | RIMS2;MIDN;SLC12A5;SIK1;CACNA1D;ATP1A1 |
| WT1 (human)     | 0.0410         | 0.34                    | -1.37   | 4.39           | RIMS2;SIK1;ATP1B3;CACNA1D;SYT7         |
| ZBTB7A (human)  | 0.0164         | 0.28                    | -1.63   | 6.69           | RIMS2;SIK1;CACNA1D;RAPGEF4             |
| ZNF148 (human)  | 0.0048         | 0.14                    | -1.69   | 8.99           | RIMS2;MIDN;GIPR;ATP1B3;CACNA1D         |
| ZNF281 (human)  | 0.0349         | 0.32                    | -1.62   | 5.45           | RIMS2;ATP1B3;CACNA1D                   |

**Supplementary Table 7 | Predicted binding sites of RNA-binding proteins in ci-Ins2 and ci-INS sequences.**

Lariat ci-Ins2 and ci-INS sequences are shown in the Fig. 1b sheet of the Excel Source Data file.

The sequence match *p* value was calculated with FIMO's dynamic programming algorithm.

| <b>motif_id</b> | <b>motif_name</b> | <b>sequence_name</b> | <b>start</b> | <b>end</b> | <b><i>p</i>_value</b> | <b>matched_sequence</b> |
|-----------------|-------------------|----------------------|--------------|------------|-----------------------|-------------------------|
| M012_0.6        | CPEB2             | human ci-INS         | 120          | 126        | 9.66E-05              | ctttttt                 |
| M149_0.6        | CPEB4             | human ci-INS         | 120          | 126        | 9.66E-05              | ctttttt                 |
| M141_0.6        | ESRP2             | human ci-INS         | 512          | 518        | 9.74E-05              | tggggag                 |
| M016_0.6        | FMR1              | human ci-INS         | 502          | 508        | 4.39E-05              | ggacagg                 |
| M296_0.6        | IGF2BP1           | rat ci-Ins2          | 339          | 349        | 7.91E-05              | atgcaaccctt             |
| M153_0.6        | LIN28A            | human ci-INS         | 409          | 415        | 4.39E-05              | cggagga                 |
| M144_0.6        | PABPC3            | mouse ci-Ins2        | 376          | 382        | 6.51E-05              | gaaaacc                 |
| M109_0.6        | RBM14             | human ci-INS         | 565          | 571        | 8.88E-05              | gggcggg                 |
| M145_0.6        | RBM5              | human ci-INS         | 573          | 579        | 5.35E-05              | gaaggag                 |
| M145_0.6        | RBM5              | rat ci-Ins2          | 164          | 170        | 5.35E-05              | gaaggag                 |
| M347_0.6        | SNRPA             | human ci-INS         | 73           | 83         | 2.65E-05              | gggcagaaggg             |
| M347_0.6        | SNRPA             | human ci-INS         | 83           | 93         | 4.52E-05              | gggcaggaggc             |
| M348_0.6        | SNRPA             | human ci-INS         | 481          | 487        | 6.51E-05              | aggagat                 |
| M104_0.6        | SRSF1             | human ci-INS         | 410          | 416        | 4.39E-05              | ggaggag                 |
| M019_0.6        | SRSF10            | rat ci-Ins2          | 383          | 389        | 7.93E-05              | agagaaa                 |
| M070_0.6        | SRSF2             | human ci-INS         | 481          | 488        | 5.61E-05              | aggagatg                |
| M065_0.6        | SRSF9             | human ci-INS         | 572          | 578        | 5.35E-05              | ggaagga                 |
| M065_0.6        | SRSF9             | rat ci-Ins2          | 163          | 169        | 5.35E-05              | ggaagga                 |
| M074_0.6        | TARDBP            | mouse ci-Ins2        | 165          | 172        | 5.04E-05              | ggaatgag                |

**Supplementary Table 8 | Genes differentially regulated in TDP-43 and ci-Ins2 knockdown.**

Genes differentially regulated in TDP-43 knockdown are available in GEO accession GSE125424 and GSE134699 for ci-Ins2 knockdown.

| ENSEMBL ID          | Gene name | direction of change |           |
|---------------------|-----------|---------------------|-----------|
|                     |           | KD ci-Ins2          | KD TDP-43 |
| ENSRNOG00000004806  | Strn      | down                | down      |
| ENSRNOG00000001516  | Ragef4    | down                | down      |
| ENSRNOG00000005711  | Ptprd     | down                | down      |
| ENSRNOG00000003723  | Wdr26     | down                | down      |
| ENSRNOG00000014856  | Etnk1     | down                | down      |
| ENSRNOG00000004232  | G2e3      | down                | down      |
| ENSRNOG00000011150  | Arsb      | down                | down      |
| ENSRNOG000000056703 | Atrx      | down                | down      |
| ENSRNOG000000028156 | Pld1      | down                | down      |
| ENSRNOG000000024602 | Plekha7   | down                | down      |
| ENSRNOG000000005726 | Pclo      | down                | down      |
| ENSRNOG000000007682 | Gria3     | down                | down      |
| ENSRNOG000000061262 | Huwe1     | down                | down      |
| ENSRNOG000000018183 | Ubr4      | down                | down      |
| ENSRNOG000000007090 | Cacna1c   | down                | down      |
| ENSRNOG000000027191 | Birc6     | down                | down      |
| ENSRNOG000000021718 | Cspp1     | down                | down      |
| ENSRNOG000000010964 | Akap13    | down                | down      |
| ENSRNOG000000052003 | Mkrn2os   | up                  | down      |
| ENSRNOG000000002079 | Mapk10    | down                | up        |
| ENSRNOG000000025612 | Sez6l     | down                | up        |
| ENSRNOG000000007733 | Arhgef9   | down                | up        |
| ENSRNOG000000004932 | Sel1l3    | down                | up        |
| ENSRNOG000000010299 | Eps15     | down                | up        |
| ENSRNOG000000032576 | Nlgn1     | down                | up        |
| ENSRNOG000000019807 | Sufu      | down                | up        |
| ENSRNOG000000006569 | Itgb8     | down                | up        |
| ENSRNOG000000001424 | Cux1      | down                | up        |
| ENSRNOG000000042951 | Xrn1      | down                | up        |
| ENSRNOG000000026432 | Syt7      | down                | up        |

**Supplementary Table 9 | Gene ontology enrichment of genes differentially regulated in both TDP-43 and ci-Ins2 knockdown conditions.**

Source Data are available in GEO accession GSE125424 for TDP-43 knockdown and GSE134699 for ci-Ins2 knockdown.

| Category   | Term                                        | Count | %          | <i>p</i> value | Genes      | List Total | Pop Hits | Pop Total | Fold Enrichment |
|------------|---------------------------------------------|-------|------------|----------------|------------|------------|----------|-----------|-----------------|
| GOTERM_BP_ | GO:0017156~calcium ion regulated exocytosis | 2     | 11.7647059 | 0.01529369     | ENSRNOG000 | 16         | 18       | 17535     | 121.7708333     |
| GOTERM_BP_ | GO:0007507~heart development                | 3     | 17.6470588 | 0.02451569     | ENSRNOG000 | 16         | 288      | 17535     | 11.41601562     |
| GOTERM_BP_ | GO:0030073~insulin secretion                | 2     | 11.7647059 | 0.02953702     | ENSRNOG000 | 16         | 35       | 17535     | 62.625          |
| GOTERM_BP_ | GO:0000209~protein polyubiquitination       | 2     | 11.7647059 | 0.08854173     | ENSRNOG000 | 16         | 108      | 17535     | 20.29513889     |

**Supplementary Table 10 | Human islet donor characteristics.**

Human islets from EXODIAB Sweden were handpicked after isolation. Hence, their purity is estimated to be >90%.

| Sample | Age (years) | Gender | BMI (Kg/m <sup>2</sup> ) | HbA1c (%) | Source of islets | Diabetes | Islet purity (%) |
|--------|-------------|--------|--------------------------|-----------|------------------|----------|------------------|
| 1      | 73          | Male   | 26.2                     | 5.4       | EXODIAB Sweden   | No       | 70               |
| 2      | 54          | Male   | 28.4                     | 5.8       | EXODIAB Sweden   | No       | 40               |
| 3      | 68          | Female | 21.5                     | 5.2       | EXODIAB Sweden   | No       | 80               |
| 4      | 53          | Female | 25.7                     | 5.5       | EXODIAB Sweden   | No       | 35               |
| 5      | 57          | Male   | 23.7                     | 5.3       | EXODIAB Sweden   | No       | 60               |
| 6      | 58          | Female | 25.7                     | 5.1       | EXODIAB Sweden   | No       | 75               |
| 7      | 49          | Female | 33.4                     | 5.8       | EXODIAB Sweden   | No       | 60               |
| 8      | 49          | Female | 27.8                     | 5.7       | EXODIAB Sweden   | No       | 95               |
| 9      | 57          | Male   | 29.9                     | 5.4       | EXODIAB Sweden   | No       | 75               |
| 10     | 44          | Female | 29.4                     | 6.9       | EXODIAB Sweden   | Yes      | 70               |
| 11     | 41          | Male   | 22.5                     | 6.8       | EXODIAB Sweden   | Yes      | 40               |
| 12     | 58          | Male   | 24.5                     | 5.8       | EXODIAB Sweden   | Yes      | 65               |
| 13     | 57          | Female | 34.6                     | 6.8       | EXODIAB Sweden   | Yes      | 75               |
| 14     | 43          | Female | 28.7                     | 7         | EXODIAB Sweden   | Yes      | 75               |
| 15     | 62          | Male   | 34.9                     | 6.4       | EXODIAB Sweden   | Yes      | 30               |
| 16     | 65          | Male   | 27.8                     | 7.2       | EXODIAB Sweden   | Yes      | 85               |
| 17     | 62          | Male   | 24.8                     | N/A       | EXODIAB Sweden   | Yes      | 90               |
| 18     | 67          | Female | 22.9                     | 6.3       | EXODIAB Sweden   | Yes      | 90               |
| 19     | 69          | Female | 33.1                     | N/A       | DCEM Italy       | No       | 70               |
| 20     | 60          | Male   | 19.1                     | N/A       | CEED France      | No       | 85               |
| 21     | 82          | Female | 21.3                     | N/A       | DCEM Italy       | No       | 80               |
| 22     | 46          | Male   | 27.2                     | N/A       | ECIT Switzerland | No       | 75               |
| 23     | 69          | Female | 36.1                     | 5.1       | CEED France      | No       | 90               |
| 24     | 58          | Male   | 25.9                     | 5.3       | CEED France      | No       | 90               |
| 25     | 71          | Female | 27.3                     | N/A       | DCEM Italy       | No       | 50               |
| 26     | 86          | Female | 20.5                     | N/A       | CEED France      | No       | 80               |



**Supplementary Table 11 | Primers used for qPCR amplification.**

OJ = Over junction primers

| Target                         | Species   | Forward primer (5'-3')     | Reverse primer (5'-3')       |
|--------------------------------|-----------|----------------------------|------------------------------|
| 18S                            | Human     | ggaattattcccctgaacg        | ggcctcactaaaccatccaa         |
| <i>Atp1a1</i>                  | Rat       | ttggagagcgtgtgctaggt       | aatggctttggctgtgattg         |
| <i>ATP1A1</i>                  | Human     | ctacctggcttgcctgtcc        | cgacgattttggcgtatctt         |
| <i>Atp1b3</i>                  | Rat       | acttttcatcaggagggtcca      | agctccatctgggactaactcg       |
| <i>ATP1B3</i>                  | Human     | cattcacgatgtgggttatgct     | ttcaaaaagtgtccatcagga        |
| <i>Cacna1d</i>                 | Rat       | caggtggatcgctcagagtcta     | ctgtctgcactcctctgctgt        |
| <i>CACNA1D</i>                 | Human     | tttgtgcagcaaaaaacacg       | agccaggaccaaaagtctgtag       |
| circHIPK3                      | Mouse     | ggggtagaccaagacttgtga      | tatgttgggtgatcctgttcgg       |
| ciRS-7                         | Mouse     | tgtatcggcgtttgacattca      | actggaagactctgaggttgt        |
| <i>Gapdh</i>                   | Mouse     | cagtggacttcccgttca         | atcactgccaccagaaagac         |
| <i>Gcg</i>                     | Rat       | gaagtaccgcctgagatt         | cgatttatgacaaaagggttc        |
| <i>Gipr</i>                    | Rat       | gtttgcatatgccagaggacag     | ctcactgccctagtccctaga        |
| <i>GIPR</i>                    | Human     | atgcctggctaattttgcatt      | ctgccctgataatttgcctc         |
| <i>Hprt1</i>                   | Mouse/Rat | agtcccagcgtcgtgattag       | aatccagcaggtcagcaaag         |
| <i>HPRT1</i>                   | Human     | ccctggcgtcgtgattagtg       | gctacaatgtgatggcctccc        |
| <i>INS</i>                     | Human     | accagctggagaactactgcaa     | tggttcaagggtttattccat        |
| INS intron 2 (divergent)       | Human     | ccctgactgtgtcctcctgt       | agcctcctgcccccttct           |
| INS intron 2 lariat (ci-INS)   | Human     | ctgtgtcctgtgagcaacc (OJ)   | tgccaccctctgatgtatct         |
| <i>Ins2</i>                    | Mouse     | tttgcagcagcacctttgt        | gctgtgcagcactgatctac         |
| <i>Ins2</i>                    | Rat       | tggggagcgtggattcttct       | cagaggggtggacagggtag         |
| Ins2 intron 1                  | Rat       | tatgtactctccagggtgggc      | cacagcgtccctcaaatccc         |
| Ins2 intron 2 (divergent)      | Mouse     | gtgtccatccatgaccagtgact    | cccaagtgtgaagaaaaccaggg      |
| Ins2 intron 2 (divergent)      | Rat       | tgagagaaaagcctgggctaa      | cactcctcctggcagctac          |
| Ins2 intron 2 lariat (ci-Ins2) | Mouse     | cctatgtgtcgtgagttctgc (OJ) | gtccaagtactaccaccaag         |
| Ins2 intron 2 lariat (ci-Ins2) | Rat       | tgtcattcatgaccagtgc        | gagcagagcttacagacacatag (OJ) |
| <i>Malat1</i>                  | Mouse     | tagagggtgggctttgttg        | actgccaggctggttatgac         |
| <i>Micu1</i>                   | Rat       | tgggactttgctctacccaaat     | agagcctagcggaaactgact        |
| <i>MICU1</i>                   | Human     | gcaggcagaagaagtctgtga      | tgaatcttctgtgttccact         |
| <i>Midn</i>                    | Rat       | tcttctcaggaccttctctgg      | gtagtttgggggtgaggtcag        |
| <i>MIDN</i>                    | Human     | gctttgcttctactccttca       | gccatccagagagactgctaca       |
| <i>Pclo</i>                    | Rat       | cccgttaagtgtgtcctct        | ggttctgttaaggagggtttg        |
| <i>PCLO</i>                    | Human     | aagtgggtcagaaggagcaagg     | gtctgggtaggacctgaattg        |
| <i>Pld1</i>                    | Rat       | accaaaaggggtcactggagta     | catcctcctttggatgtgactg       |
| <i>PLD1</i>                    | Human     | ttagctgctgggtgattgaaa      | ccctgggtgagaggcgttaatac      |
| <i>PPIA</i>                    | Human     | tctgccaccttaacagacc        | accaggggaatacgtaacag         |
| <i>Rapgef4</i>                 | Mouse     | acgtgcacactctcagtct        | ccgataaacaatctgacgaa         |
| <i>Rapgef4</i>                 | Rat       | gattgcaatactgcccagaacg     | gccttcgaggctctaactgtg        |
| <i>RAPGEF4</i>                 | Human     | gctgcattcagcttaccagcta     | acgtggccttattcaactt          |
| <i>Rims2</i>                   | Rat       | cctgcttccctagggtggtt       | gacagcctggatgatttctc         |
| <i>RIMS2</i>                   | Human     | cctgcttccctagggtggtt       | catgacagccaggatgatttctc      |
| <i>Sik1</i>                    | Rat       | tctgggactgaacaagatcaa      | agtcagatgagacggctgagtg       |
| <i>SIK1</i>                    | Human     | gctgctgacgtttatgcatttc     | caaaacccaaaaagcctagggtg      |
| <i>Slc12a5</i>                 | Rat       | caactacaccaactgcctcag      | agccgcagaaaggagataaac        |
| <i>SLC12A5</i>                 | Human     | ggcacctttctggaaaatcatc     | caatgaagttcctccacgtctg       |
| <i>Syt4</i>                    | Rat       | taccagcatggatgaacaatc      | caaaactcaggacgggtgaagtg      |
| <i>SYT4</i>                    | Human     | gatattccttgtgaggccttg      | tgtctcctgggtagtcaaga         |
| <i>Syt7</i>                    | Mouse     | ccagaagttcaggggagtcct      | tgcgtgagtagctcagagcag        |
| <i>Syt7</i>                    | Rat       | ctgttctctgcaatcatcacc      | gtattcacagccttccctcct        |
| <i>SYT7</i>                    | Human     | ctgttctctgcaatcatcacc      | ccaaggaattctgtagcgttt        |
| <i>Unc13a</i>                  | Mouse/Rat | accttaaccagtggtggaaga      | tgtctgccttaggaagtcatca       |
| <i>UNC13A</i>                  | Human     | tttggatggctggaagaat        | gttctagcctgggagtcaggaa       |
